# Supplementary material for: Designing small universal k-mer hitting sets for improved analysis of high-throughput sequencing
Source: PubMed Central journal article supplement (PMC5645146; doi:10.1371/journal.pcbi.1005777), 2017-10-02
Supplement: pcbi.1005777.s002.pdf [file pcbi.1005777.s002.pdf]

## Supporting Information

Fig A

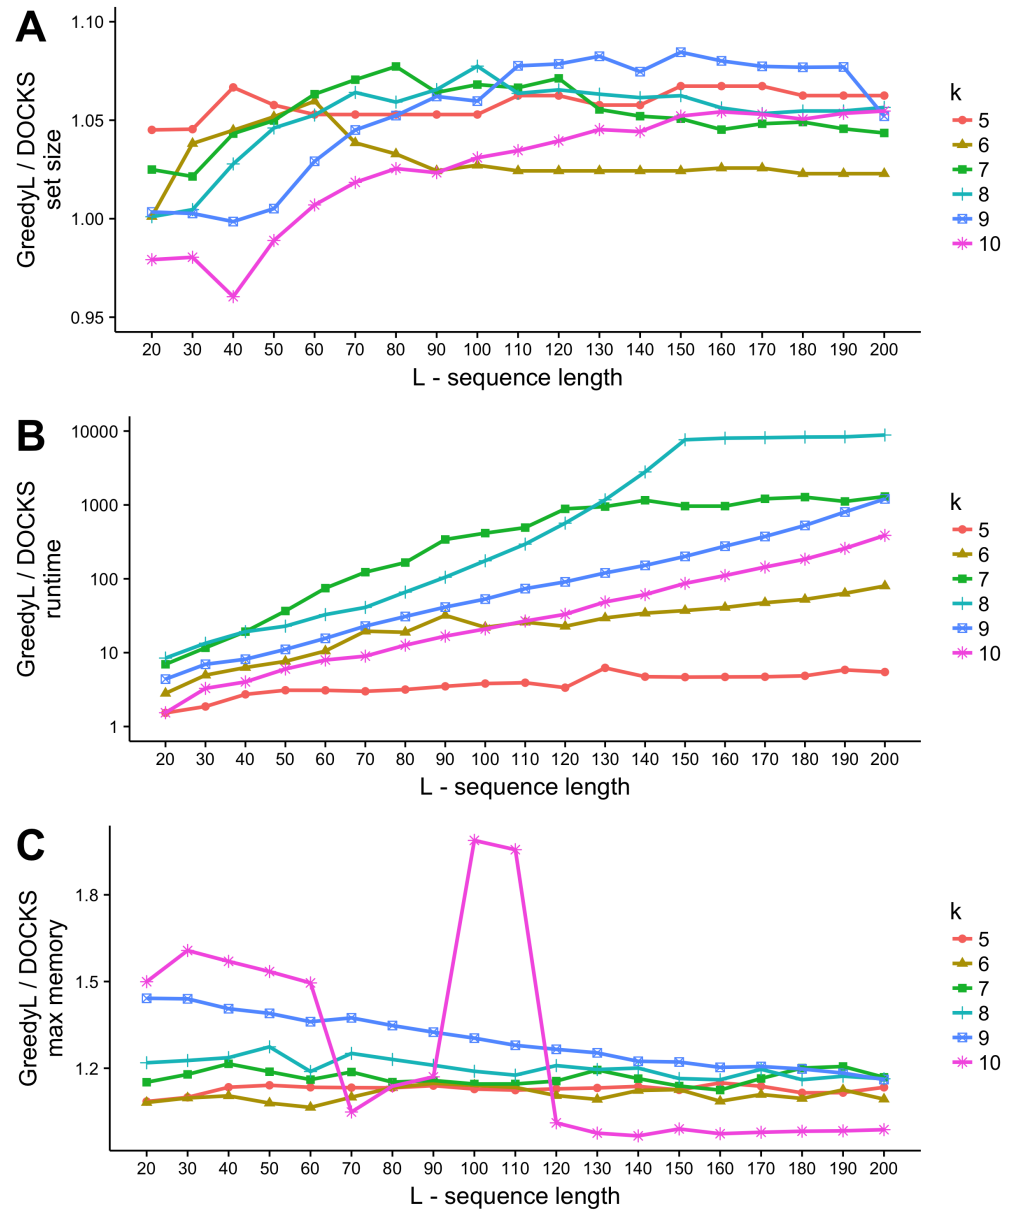

Performance of the greedy algorithm compared to DOCKS. The graphs show the ratio between the greedy algorithm and DOCKS in terms of (A) the  $k$ -mer set size generated; (B) the runtime used; (C) the max memory used.

Fig B

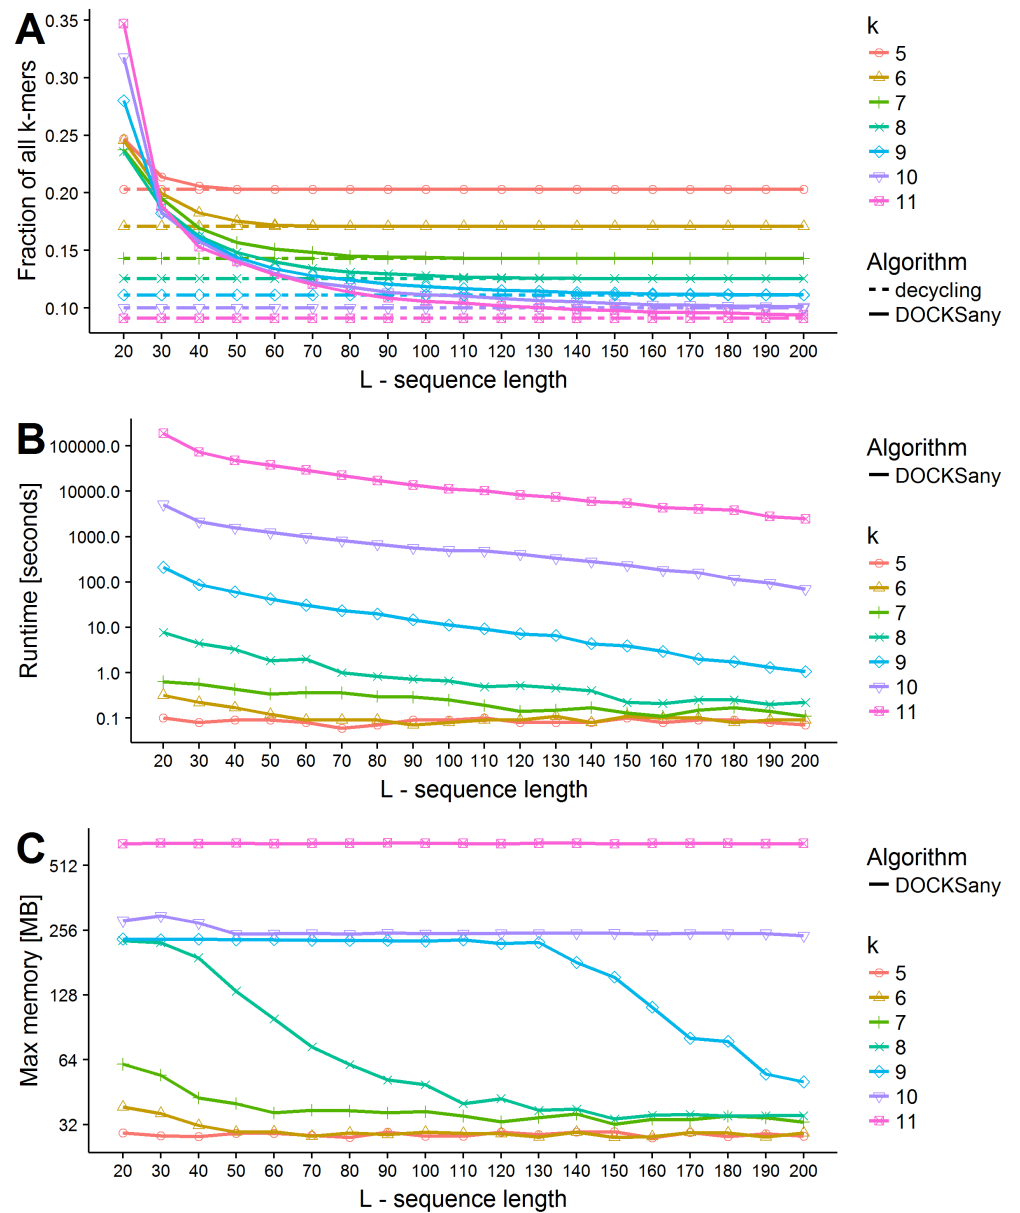

**Performance of DOCKSany.** For different combinations of  $k$  and  $L$  we ran DOCKSany over the DNA alphabet. (A) Set sizes. The results are shown as a fraction of the total number of  $k$ -mers  $|\Sigma|^k$ . The broken lines show the decycling set size for each  $k$ . (B) Running time in seconds. Note that y-axis is in log scale. (C) Maximum memory usage in megabytes. Note that y-axis is in log scale.

Fig C

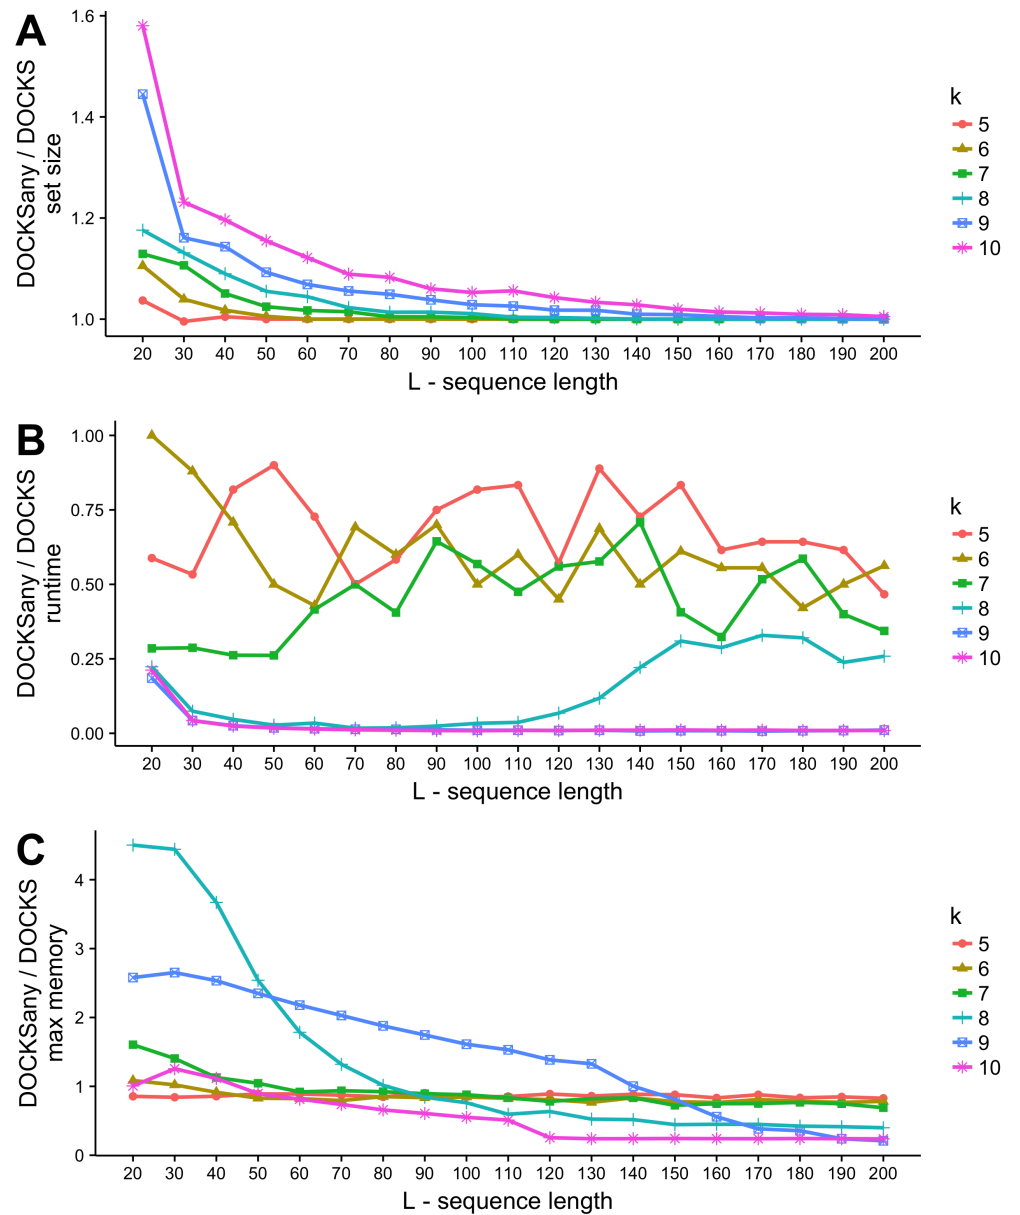

Performance of DOCKSany compared to DOCKS. The graphs show the ratio between DOCKSany and DOCKS for (A) the  $k$ -mer set size generated; (B) the runtime used; (C) the maximum memory used.

Fig D

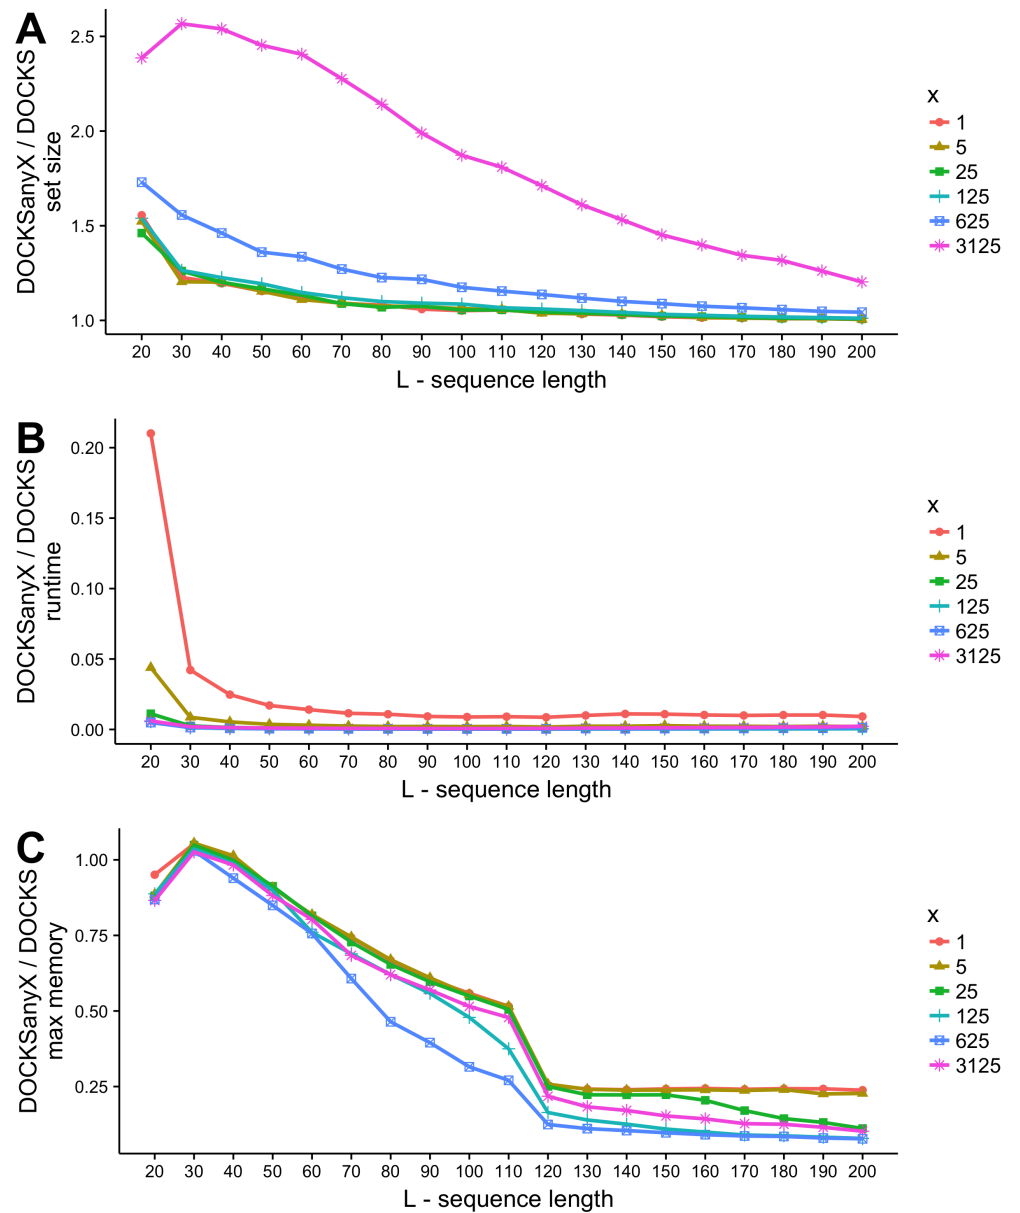

**Performance of DOCKSanyX.** The graphs show the ratio between DOCKSanyX and DOCKS on  $k = 10$  for (A) the  $k$ -mer set size generated; (B) the runtime used; (C) the maximum memory used.

Fig E

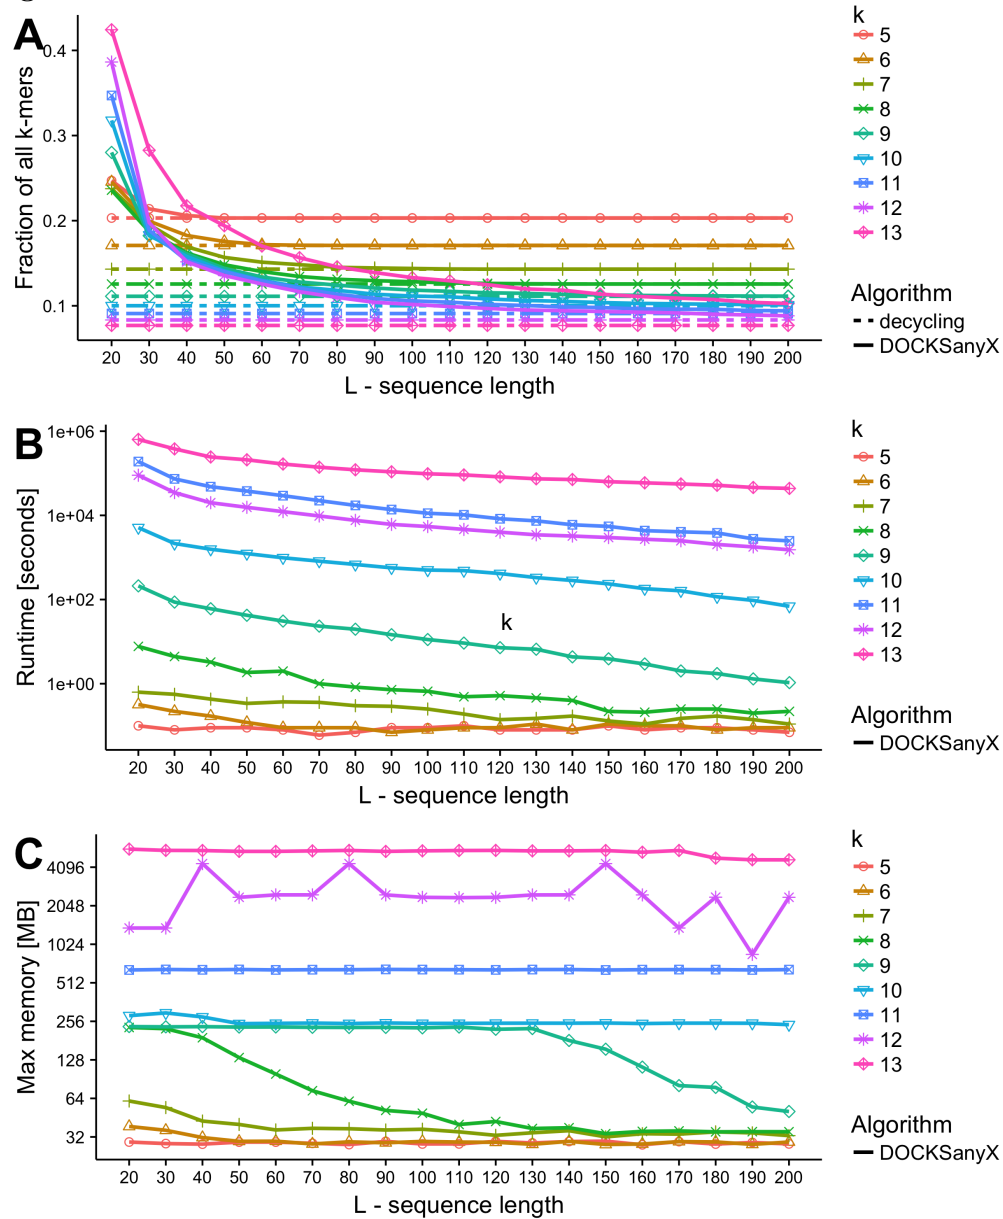

**Performance of DOCKSanyX.** For different combinations of  $k$  and  $L$  we ran DOCKSanyX over the DNA alphabet.  $X$  value was 1 for  $5 \leq k \leq 11$ , 100 for  $k = 12$  and 10000 for  $k = 13$ . (A) Set sizes. The results are shown as a fraction of the total number of  $k$ -mers  $|\Sigma|^k$ . The broken lines show the decycling set size for each  $k$ . (B) Running time in seconds. Note that y-axis is in log scale. (C) Maximum memory usage in megabytes. Note that y-axis is in log scale.

## Appendix

In this section we prove theoretical results used in the body of the paper.

### NP-hardness of MINIMUM $(k, L)$ -HITTING SET

One of the motivations for a universal  $k$ -mer set comes from the fact that the problem of finding a minimum-size  $k$ -mer set that hits every string in a given set of  $L$ -long strings is NP-hard. The hitting set problem, if a given set of target sequences is part of the input, is as follows:

#### MINIMUM $(k, L)$ -HITTING SET

INSTANCE: Set  $S$  of  $L$ -long sequences over  $\Sigma$  and  $k$ .

VALID SOLUTION: Set  $X$  of  $k$ -mers s.t.  $S \subseteq \text{hit}(X, L)$ .

GOAL: Minimize  $|X|$ .

We prove that MINIMUM  $(k, L)$ -HITTING SET is NP-hard. For simplicity, we study the problem on the DNA alphabet, but it can be easily generalized to any finite alphabet  $\Sigma$ . We show a reduction from HITTING SET [1]. While the problems look similar, HITTING SET is a more general case than our problem, since in HITTING SET the subsets are arbitrary, while in MINIMUM  $(k, L)$ -HITTING SET problem each subset is made of overlapping  $k$ -mers. Hence, the hardness of the former does not directly imply hardness of the latter.

**Theorem 1.** *MINIMUM  $(k, L)$ -HITTING SET is NP-hard.*

*Proof.* Given an input to HITTING SET, a set  $S$  of subsets of  $E = \{e_1 \dots e_n\}$ , we generate an input to MINIMUM  $(k, L)$ -HITTING SET problem as follows: Denote by  $m$  the size of the maximum cardinality set, i.e.  $m = \max_{S_i \in S} |S_i|$ . We choose  $\ell = \lceil \log_2(\max(m, n)) \rceil$ ,  $L = 3\ell m$  and  $k = 2\ell$ . We map each set  $S_i \in S$  to a  $k$ -long binary representation of  $i$ , where instead of bits we use nucleotides C and G. We map each element  $e_j \in E$  to a  $k$ -long binary representation of  $j$ , where instead of bits we use nucleotides A and T. We call these representations the set's  $\{C, G\}$ -representation and the element's  $\{A, T\}$ -representation and denote them by  $f_{CG}(S_i)$  and  $f_{AT}(e_j)$ .

We generate a sequence set  $T$ , which is the input to MINIMUM  $(k, L)$ -HITTING SET. For each set  $S_i \in S$  we generate a sequence that contains all of its elements'  $\{A, T\}$ -representations, each appearing twice consecutively and buffered by the set's  $\{C, G\}$ -representation. Formally, for the set  $S_i = \{e_{i_1}, \dots, e_{i_{|S_i|}}\}$  we create the sequence:  $T_i := (\prod_{j=1}^{|S_i|} f_{AT}(e_{i_j}) \cdot f_{AT}(e_{i_j}) \cdot f_{CG}(S_i)) \cdot (f_{AT}(e_{i_1}) \cdot f_{AT}(e_{i_1}) \cdot f_{CG}(S_i))^{m-|S_i|}$  (here  $\prod$  indicates concatenation). The new instance  $T$  is  $\{T_1, \dots, T_{|S|}\}$ .

Denote by  $T^{OPT}$  an optimal solution to MINIMUM  $(k, L)$ -HITTING SET. If a  $k$ -mer contains as a substring a complete  $\{A, T\}$ -representation  $w$ , then the element  $f_{AT}^{-1}(w)$  is in the optimal solution to HITTING SET. If a  $k$ -mer contains a complete  $\{C, G\}$ -representation  $w$ , then any element from the set  $f_{CG}^{-1}(w)$  can be part of the optimal solution. The running time of the reduction is bounded by  $O(|S| \times L)$  to generate the input sequence set  $T$ . In terms of  $m$  and  $n$  the running time is  $O(|S| \cdot m \cdot (\log(m) + \log(n)))$ .

We now prove the correctness of the reduction. We start with proving several properties of the solution.

**Lemma 1.** *A  $k$ -mer that contains a complete  $\{A, T\}$ -representation  $w$  can be replaced by  $k$ -mer  $ww$  to produce a hitting set of the same cardinality.*

*Proof.* The  $k$ -mer contains a complete  $\{A, T\}$ -representation  $w$ . Thus, it can only hit sequences that contain  $w$ . Since the sequences were constructed to contain two adjacent  $\{A, T\}$ -representations per element, and since this representation is unique,  $k$ -mer  $ww$  hits the same set of sequences. □

**Lemma 2.** *A  $k$ -mer that contains a complete  $\{C, G\}$ -representation can be replaced by a  $k$ -mer that contains two adjacent occurrences of any  $\{A, T\}$ -representation from this sequence to produce a hitting set of the same cardinality.*

*Proof.* A  $\{C, G\}$ -representation is unique to each sequence. Thus, it can only hit one sequence, and replacing it by any other  $k$ -mer from that sequence preserves the hitting properties of the set. □

We now prove the two sides of the reduction:

1. MINIMUM  $(k, L)$ -HITTING SET  $\Rightarrow$  HITTING SET: all  $L$ -long sequences in  $T$  are hit by  $k$ -mers in  $T^{OPT}$ . By Lemmas 1 and 2 we can transform any hitting set

to a hitting set of the same cardinality, but containing only  $k$ -mers over  $\{A, T\}$ . These correspond to elements in an optimal solution of HITTING SET. Assume contrary that there is a smaller solution  $U$  to HITTING SET. Then, the set  $\{f_{AT}(w) \cdot f_{AT}(w) \mid w \in U\}$  hits all sequences in the  $k$ -mer hitting problem, and by that producing a smaller solution, contrary to its optimality.

2. HITTING SET  $\Rightarrow$  MINIMUM  $(k, L)$ -HITTING SET: denote by  $S^{OPT}$  an optimal solution to HITTING SET. Then, a set of  $k$ -mers  $\{f_{AT}(w) \cdot f_{AT}(w) \mid w \in S^{OPT}\}$  is an optimal solution to MINIMUM  $(k, L)$ -HITTING SET. Assume contrary that there is a smaller solution  $U$  to MINIMUM  $(k, L)$ -HITTING SET. By Lemmas 1 and 2 there is a solution composed of  $k$ -mers over  $\{A, T\}$ . The set of element  $\{f_{AT}^{-1}(w_{1:k/2}) \mid w \in U\}$  is a smaller hitting set in HITTING SET, contrary to its optimality.

□

## NP-hardness of MINIMUM $\ell$ -PATH COVER IN A DAG

Our heuristic to find  $U_{k,L}$  searches for a minimum  $\ell$ -path cover in the DAG created after removing a decycling set. In the second phase of DOCKS we encounter a special case of the following problem.

### MINIMUM $\ell$ -PATH VERTEX COVER IN A DAG

INSTANCE: A directed acyclic graph  $G = (V, E)$  and integer  $\ell$ .

VALID SOLUTION: Vertex set  $X$  s.t.  $G' = (V \setminus X, E)$  contains no  $\ell$ -long paths.

GOAL: Minimize  $|X|$ .

This general problem was shown to be NP-hard in [2]. A special case of the problem, for an acyclic subgraph of the de Bruijn graph, arises in the second phase of DOCKS after removing a minimum decycling set. The hardness result motivates the use of heuristics in the second phase.

## Validity of the ILP formulation

**Lemma 3.** *The ILP is a valid formulation of the minimum hitting set problem.*



*Proof.* Suppose  $S$  is a UHS, and define  $x_v^* = 1 \iff v \in S$ ,  $L_v^* = 0$  if  $v \in S$  and otherwise  $L_v^*$  equal to the length of the longest path ending at  $v$ . We claim that  $(x^*, L^*)$  satisfy the constraints. By construction, (8) holds. To show (9), if  $v \in S$  then  $0 = L_v^* \geq 1 + L_u^* - \ell$ . If  $v \notin S$ , then  $L_v^* \geq 1 + L_u^*$  by the property of the longest path labels. Hence all constraints are satisfied. Conversely, suppose the vectors  $x^*$  and  $L^*$  solve the ILP. W.l.o.g., we can assume that  $L^*$  is integer (otherwise round all coordinates down and all inequalities still hold for the new solution). Define  $S = \{i \mid x_i^* = 1\}$ . We claim that  $S$  is a UHS. Suppose by contradiction there exists a path of  $\ell$  edges  $p = (u_0, e_0, u_1, e_1, \dots, u_\ell)$  in the graph induced by  $G_k \setminus S$  (i.e. the DAG induced by removing the set  $S$  from the order  $k$  de Bruijn graph). Then,  $x_{u_i}^* = 0$  for  $i = 0, \dots, \ell$  and summing the inequalities (9) for the edges in the path we get  $L_{u_\ell} \geq L_{u_0} + \ell$ , which contradicts (8). Hence,  $S$  is indeed a UHS.  $\square$

## References

1. Karp RM. Reducibility among combinatorial problems. In: 50 Years of Integer Programming 1958-2008. Springer; 2010. p. 219–241.
2. Paindavoine M, Vialla B. Minimizing the Number of Bootstrappings in Fully Homomorphic Encryption. In: Revised Selected Papers of the 22Nd International Conference on Selected Areas in Cryptography - SAC 2015 - Volume 9566. New York, NY, USA: Springer-Verlag New York, Inc.; 2016. p. 25–43. Available from: [http://dx.doi.org/10.1007/978-3-319-31301-6\\_2](http://dx.doi.org/10.1007/978-3-319-31301-6_2).
