# Supplementary material for: Designing small universal k-mer hitting sets for improved analysis of high-throughput sequencing
Source: PLoS Comput Biol. 2017 Oct 2;13(10):e1005777. doi: 10.1371/journal.pcbi.1005777 (PMC5645146; doi:10.1371/journal.pcbi.1005777)
Supplement: S1 Table — The table contains solution set size, time in seconds and memory in KB for DOCKS, DOCKSany, DOCKSanyX and the greedy approach algorithms. Note that the reported times are for individual runs of each (k, L) pair, but the sets for all longer L values are computed when computing the (k, L = 20) set with DOCKSany or DOCKSanyX and the runtime can be amortized across all of these calculations. (XLSX) [file pcbi.1005777.s001.xlsx]

## Sheet: Description
The table in the following data sheets contains the set sizes, run times (in seconds), and memory usage (in kilobytes) of DOCKS, DOCKSany, DOCKSanyX and GreedyL for different values of k, L and x (for DOCKSanyX).

## Sheet: DOCKS
k	L	Set size	Time (s)	Memory (KB)
5	20	244	0.17	34964
5	30	220	0.15	34528
5	40	210	0.11	33608
5	50	208	0.1	33528
5	60	208	0.11	33592
5	70	208	0.12	33504
5	80	208	0.12	33724
5	90	208	0.12	33552
5	100	208	0.11	34012
5	110	208	0.12	33912
5	120	208	0.14	34008
5	130	208	0.09	34200
5	140	208	0.11	34088
5	150	208	0.12	34552
5	160	208	0.13	34180
5	170	208	0.14	34288
5	180	208	0.14	34576
5	190	208	0.13	34980
5	200	208	0.15	34956
6	20	910	0.32	36472
6	30	786	0.25	36132
6	40	735	0.24	35444
6	50	715	0.24	36544
6	60	704	0.21	36944
6	70	701	0.13	36376
6	80	700	0.15	35216
6	90	700	0.1	35284
6	100	700	0.16	35748
6	110	700	0.15	36188
6	120	700	0.2	36908
6	130	700	0.16	37396
6	140	700	0.16	36232
6	150	700	0.18	36728
6	160	700	0.18	37672
6	170	700	0.18	37244
6	180	700	0.19	38176
6	190	700	0.18	37336
6	200	700	0.16	38232
7	20	3447	2.21	38964
7	30	2892	1.95	39564
7	40	2640	1.64	38652
7	50	2508	1.3	39244
7	60	2436	0.89	40404
7	70	2395	0.72	40844
7	80	2368	0.74	41156
7	90	2356	0.45	41536
7	100	2350	0.44	42820
7	110	2346	0.4	43060
7	120	2344	0.25	43140
7	130	2344	0.26	42988
7	140	2344	0.24	43984
7	150	2344	0.32	45276
7	160	2344	0.34	46400
7	170	2344	0.29	45924
7	180	2344	0.29	46716
7	190	2344	0.35	47136
7	200	2344	0.32	48616
8	20	13145	34.49	52120
8	30	10851	59.56	51680
8	40	9748	69.61	53176
8	50	9207	67.5	53772
8	60	8798	57.9	56924
8	70	8611	58.25	56976
8	80	8481	45.03	61340
8	90	8375	29.58	62688
8	100	8315	19.69	65808
8	110	8280	13.33	68824
8	120	8254	7.69	68080
8	130	8240	3.9	72720
8	140	8233	1.81	74716
8	150	8230	0.71	78204
8	160	8230	0.73	80588
8	170	8230	0.76	81400
8	180	8230	0.78	84972
8	190	8230	0.84	86864
8	200	8230	0.85	90172
9	20	50832	1138.73	92460
9	30	41175	2028.5	89512
9	40	36925	2362.87	93988
9	50	34538	2288.66	100624
9	60	32840	1989.13	108640
9	70	31779	1723.94	115972
9	80	31062	1473.26	124980
9	90	30530	1254.59	134552
9	100	30191	1081.86	144604
9	110	29899	890.31	154420
9	120	29694	775.55	164052
9	130	29526	645.96	173412
9	140	29406	545.23	185228
9	150	29328	449.82	195504
9	160	29270	345.77	205916
9	170	29234	273.74	215124
9	180	29206	205.05	224220
9	190	29185	141.87	234484
9	200	29169	97.22	246752
10	20	210875	24073.6	288544
10	30	155968	50272.4	242860
10	40	138482	64253.9	254136
10	50	128117	70583.6	280880
10	60	121504	68249	310944
10	70	117571	69762.9	344444
10	80	114464	65682.2	382900
10	90	112392	61970.2	419640
10	100	111011	57579.3	458360
10	110	109731	49800.7	495644
10	120	108695	43050.2	996320
10	130	107865	31832.5	1058512
10	140	107300	26780.9	1054072
10	150	106738	21191.4	1048208
10	160	106342	17616	1045608
10	170	106035	15050.8	1057460
10	180	105782	12090.6	1046044
10	190	105548	9987.67	1052220
10	200	105388	7406.13	1039492
11	20	873408	463782	1019196
11	30	607443	515358	1103544
11	40	523485	529032	1144036
11	50	484246	516317	1144548
11	60	462359	501555	1162228
11	70	439549	431599	1282356
11	80	424580	375992	1826644
11	90	415807	362593	1566216
11	100	409969	371033	2830512
11	110	406585	356840	2813944
11	120	401349	312004	2344532
11	130	398265	286847	2811072
11	140	395506	282866	2814112
11	150	393537	271824	2804968
11	160	391553	250738	2831052
11	170	389744	220512	4068456
11	180	388311	203940	4068352
11	190	387051	177490	4064448
11	200	385863	148367	4062868

## Sheet: DOCKSany
k	L	Set size	Time (s)	Memory (KB)
5	20	253	0.1	29896
5	30	219	0.08	29068
5	40	211	0.09	28776
5	50	208	0.09	29852
5	60	208	0.08	29852
5	70	208	0.06	29212
5	80	208	0.07	28560
5	90	208	0.09	30244
5	100	208	0.09	28868
5	110	208	0.1	28904
5	120	208	0.08	30248
5	130	208	0.08	29404
5	140	208	0.08	30172
5	150	208	0.1	30368
5	160	208	0.08	28444
5	170	208	0.09	30120
5	180	208	0.09	28824
5	190	208	0.08	29640
5	200	208	0.07	28904
6	20	1006	0.32	39568
6	30	817	0.22	36916
6	40	748	0.17	32396
6	50	719	0.12	30268
6	60	704	0.09	30356
6	70	701	0.09	28876
6	80	700	0.09	29992
6	90	700	0.07	29472
6	100	700	0.08	30232
6	110	700	0.09	29872
6	120	700	0.09	29756
6	130	700	0.11	28696
6	140	700	0.08	30256
6	150	700	0.11	28592
6	160	700	0.1	28836
6	170	700	0.1	30116
6	180	700	0.08	29940
6	190	700	0.09	28660
6	200	700	0.09	29912
7	20	3892	0.63	62528
7	30	3200	0.56	55576
7	40	2774	0.43	43588
7	50	2570	0.34	41016
7	60	2478	0.37	37148
7	70	2430	0.36	38256
7	80	2379	0.3	37976
7	90	2367	0.29	37108
7	100	2357	0.25	37620
7	110	2347	0.19	35904
7	120	2344	0.14	33720
7	130	2344	0.15	35308
7	140	2344	0.17	36660
7	150	2344	0.13	32796
7	160	2344	0.11	34716
7	170	2344	0.15	34444
7	180	2344	0.17	35856
7	190	2344	0.14	35236
7	200	2344	0.11	33532
8	20	15458	7.7	234672
8	30	12275	4.43	229516
8	40	10623	3.26	195168
8	50	9714	1.85	136564
8	60	9189	1.99	101572
8	70	8808	1	75224
8	80	8597	0.83	62276
8	90	8491	0.72	52816
8	100	8406	0.66	50164
8	110	8312	0.49	40984
8	120	8280	0.52	43248
8	130	8253	0.46	38136
8	140	8236	0.4	38660
8	150	8230	0.22	34740
8	160	8230	0.21	36220
8	170	8230	0.25	36512
8	180	8230	0.25	35920
8	190	8230	0.2	36012
8	200	8230	0.22	35976
9	20	73446	211.08	238468
9	30	47806	86.89	237368
9	40	42219	60.47	238220
9	50	37741	42.25	236440
9	60	35096	30.77	236752
9	70	33549	23.34	235332
9	80	32590	19.7	234744
9	90	31697	14.61	234936
9	100	31054	11.2	233056
9	110	30669	9.23	236368
9	120	30222	7.18	227176
9	130	30046	6.59	230124
9	140	29693	4.34	185736
9	150	29588	3.9	158748
9	160	29427	2.94	115096
9	170	29307	2.01	82512
9	180	29283	1.74	79816
9	190	29213	1.3	56156
9	200	29186	1.06	51756
10	20	333242	5107.9	290272
10	30	192049	2144.44	304944
10	40	165660	1568.29	283612
10	50	147985	1234.31	251492
10	60	136295	982.33	252888
10	70	128034	816.1	254040
10	80	123932	681.13	252036
10	90	119141	565.73	254528
10	100	116864	502.06	252544
10	110	115884	485.75	252760
10	120	113329	414.2	253344
10	130	111468	331.89	253616
10	140	110339	283.58	253496
10	150	108846	235.67	254308
10	160	107855	180.93	251820
10	170	107344	161.22	253700
10	180	106796	116.2	253704
10	190	106474	95.44	253220
10	200	105931	69.12	246852
11	20	1455675	189986	660460
11	30	791316	73600.4	666304
11	40	641980	47988.6	662400
11	50	587952	37760.9	666360
11	60	541523	29371.4	661056
11	70	505708	22439.4	663656
11	80	476374	17238.6	663788
11	90	455329	13732.3	667072
11	100	443751	11233.7	665052
11	110	437489	10291.5	663932
11	120	426560	8300.63	661428
11	130	420901	7401.2	665356
11	140	413956	5977.72	665720
11	150	411144	5464.29	660112
11	160	404625	4336.62	663944
11	170	402567	4061.03	664988
11	180	402183	3828.1	664116
11	190	396381	2766.93	660916
11	200	394721	2474.09	664456
12	20	1702045	3.92958e+06	1511264
12	30	1515520	1.59933e+06	1587624
12	40	1469518	926034	1588516
12	50	1449984	736852	1588904
12	60	1432969	629084	1512816
12	70	1427298	506681	1509616
12	80	1420996	420233	1588620
12	90	1414695	363460	1586816
12	100	1409654	320301	1588484
12	110	1410284	290947	1587412
12	120	1409024	250964	1570444
12	130	1410284	227908	1510388
12	140	1406503	219331	1585612
12	150	1405873	214689	1511156
12	160	1405873	179603	1587892
12	170	1405873	163657	1590472
12	180	1404612	139895	1589788
12	190	1403982	123602	1587888
12	200	1403982	123213	1587816
													253
													219
													211
													208
													208
													208
													208
													208
													208
													208
													208
													208
													208
													208
													208
													208
													208
													208
													208
													1006
													817
													748
													719
													704
													701
													700
													700
													700
													700
													700
													700
													700
													700
													700
													700
													700
													700
													700
													3892
													3200
													2774
													2570
													2478
													2430
													2379
													2367
													2357
													2347
													2344
													2344
													2344
													2344
													2344
													2344
													2344
													2344
													2344
													8406
													8312
													8280
													8253
													8236
													8230
													8230
													8230
													8230
													8230
													8230
													15458
													12275
													10623
													9714
													9189
													8808
													8597
													8491
													31054
													30669
													30222
													30046
													29693
													29588
													29427
													29307
													29283
													29213
													29186
													73446
													47806
													42219
													37741
													35096
													33549
													32590
													31697
													333242
													192049
													165660
													147985
													136295
													128034
													123932
													119141
													116864
													115884
													113329
													111468
													110339
													108846
													107855
													107344
													106796
													106474
													105931

## Sheet: DOCKSanyX
k	L	X	Set Size	Time (s)	Memory(KB)
10	20	125	329843	133.7	256108
10	20	1	333242	5058.46	274340
10	20	25	313068	268.61	254284
10	20	3125	511218	145.5	249784
10	20	5	326358	1057.13	255580
10	20	625	370593	118.14	250688
10	30	125	197968	60.35	251616
10	30	1	192049	2120.71	255744
10	30	25	197368	127.95	254728
10	30	3125	401843	100.78	249244
10	30	5	188488	435.38	256320
10	30	625	243718	69.03	250032
10	40	125	169843	47.82	251052
10	40	1	165660	1588.56	254184
10	40	25	166468	89.89	253772
10	40	3125	351843	84.58	249792
10	40	5	166558	344.77	257584
10	40	625	202468	51.71	238736
10	50	125	152968	34.36	252508
10	50	1	147985	1201.97	255676
10	50	25	149543	69.47	256364
10	50	3125	314343	71.41	247644
10	50	5	147843	257.05	254956
10	50	625	174343	38.05	238580
10	60	125	139468	26.89	236352
10	60	1	136295	960.41	253344
10	60	25	137743	53.92	253408
10	60	3125	292468	63.6	249748
10	60	5	134928	204.44	254604
10	60	625	162468	33.9	235240
10	70	125	131593	21.47	237360
10	70	1	128034	800.91	255832
10	70	25	127893	42.08	250692
10	70	3125	267468	54.98	235592
10	70	5	128233	169.41	256544
10	70	625	149343	29.03	209140
10	80	125	126093	17.79	237596
10	80	1	123932	710.39	255608
10	80	25	122618	34.34	250340
10	80	3125	245593	49.7	237464
10	80	5	123353	135.51	256480
10	80	625	140593	26.67	177768
10	90	125	122718	15.43	234292
10	90	1	119141	573.31	253772
10	90	25	120843	31.75	250248
10	90	3125	223718	43.22	238928
10	90	5	120643	132.34	255900
10	90	625	136843	22.4	165844
10	100	125	120718	15.75	219432
10	100	1	116864	509.47	256012
10	100	25	117243	25.15	251852
10	100	3125	208093	38.09	236088
10	100	5	118028	116.36	253992
10	100	625	130593	20	144496
10	110	125	117218	12	185800
10	110	1	115884	452.44	255476
10	110	25	115943	22.15	250308
10	110	3125	198718	35.36	237104
10	110	5	116193	104.95	255260
10	110	625	126843	18.53	134132
10	120	125	115343	11.22	163448
10	120	1	113329	372.73	253932
10	120	25	113593	20.13	249256
10	120	3125	186218	33.96	217176
10	120	5	112913	75.53	257000
10	120	625	123718	16.85	124028
10	130	125	113468	9.2	147592
10	130	1	111468	317.19	255860
10	130	25	112093	17.82	235756
10	130	3125	173718	30.99	193696
10	130	5	111668	74.13	255008
10	130	625	120593	19.96	117264
10	140	125	111843	8.53	132380
10	140	1	110339	295.65	252420
10	140	25	110668	13.84	234484
10	140	3125	164343	27.56	180172
10	140	5	110873	61.75	250848
10	140	625	118093	13.48	110028
10	150	125	110218	7.15	114708
10	150	1	108846	230.49	253928
10	150	25	109243	11.72	233432
10	150	3125	154968	24.99	160176
10	150	5	109593	57.5	249976
10	150	625	116218	12.78	101780
10	160	125	109218	6.27	103736
10	160	1	107855	181.32	254924
10	160	25	108493	10.95	213876
10	160	3125	148718	23.95	149544
10	160	5	107958	40.94	250012
10	160	625	114343	11.55	94860
10	170	125	108343	5.59	94800
10	170	1	107344	149.72	254804
10	170	25	107693	8.43	180240
10	170	3125	142468	21.61	134624
10	170	5	107358	34.13	250676
10	170	625	113093	11.01	91460
10	180	125	107718	4.79	91052
10	180	1	106796	123.75	254188
10	180	25	106968	6.95	150628
10	180	3125	139343	20.45	130892
10	180	5	106853	25.12	250992
10	180	625	111843	10.35	88820
10	190	125	107093	4.18	86776
10	190	1	106474	102.35	255192
10	190	25	106693	6.11	138240
10	190	3125	133093	17.94	121200
10	190	5	106568	23.31	237392
10	190	625	110593	8.62	83816
10	200	125	106593	3.76	81320
10	200	1	105931	68.06	247480
10	200	25	106243	4.85	115704
10	200	3125	126843	16.86	106356
10	200	5	106003	14.56	236168
10	200	625	109968	8.89	80208
12	20	100	5083800	89875.1	1404108
12	30	100	1917700	34755.5	1404544
12	40	100	1145900	19980.1	4472476
12	50	100	875400	15526.2	2439596
12	60	100	708400	12259.2	2549284
12	70	100	557300	9674.56	2549464
12	80	100	443600	7606.75	4471404
12	90	100	347200	6100.42	2548416
12	100	100	306300	5426.37	2438952
12	110	100	264100	4633.1	2425396
12	120	100	227800	3989.75	2439424
12	130	100	196700	3449.36	2546688
12	140	100	183500	3228.93	2549244
12	150	100	167200	2975.1	4473220
12	160	100	153300	2707.16	2547404
12	170	100	139600	2493.53	1403852
12	180	100	113700	2036.01	2445108
12	190	100	98600	1780.91	874044
12	200	100	81500	1522.93	2440204
13	20	10000	11472224	673483	5809092
13	30	10000	8682224	379672	5674136
13	40	10000	8372224	243886	5662192
13	50	10000	8042224	209069	5575176
13	60	10000	7942224	165809	5573576
13	70	10000	7632224	139505	5624760
13	80	10000	7452224	120996	5672460
13	90	10000	7322224	108331	5571720
13	100	10000	7212224	97316.3	5628868
13	110	10000	6982224	91440.5	5661836
13	120	10000	6892224	82193.8	5673360
13	130	10000	24882224	73905.2	5625600
13	140	10000	18972224	71076.7	5627488
13	150	10000	14592224	63102.3	5660168
13	160	10000	13022224	59280.4	5491120
13	170	10000	11422224	55677.3	5667432
13	180	10000	10502224	51894.9	4936392
13	190	10000	9782224	45962.7	4792504
13	200	10000	9332224	43701.3	4788476

## Sheet: GreedyL
k	L	Set size	Time (s)	Memory (KB)
5	20	255	0.26	37936
5	30	230	0.28	37960
5	40	224	0.3	38120
5	50	220	0.31	38260
5	60	219	0.34	38096
5	70	219	0.36	37956
5	80	219	0.38	38184
5	90	219	0.42	38244
5	100	219	0.42	38368
5	110	221	0.47	38128
5	120	221	0.47	38384
5	130	220	0.56	38708
5	140	220	0.52	38768
5	150	222	0.56	38868
5	160	222	0.61	39288
5	170	222	0.66	39016
5	180	221	0.68	38552
5	190	221	0.76	39024
5	200	221	0.82	39640
6	20	911	0.9	39444
6	30	816	1.24	39640
6	40	768	1.51	39152
6	50	752	1.83	39444
6	60	746	2.21	39332
6	70	728	2.54	40008
6	80	723	2.83	39896
6	90	717	3.2	40504
6	100	719	3.52	40792
6	110	717	3.88	41032
6	120	717	4.55	40800
6	130	717	4.72	40848
6	140	717	5.48	40692
6	150	717	6.69	41360
6	160	718	7.37	40912
6	170	718	8.54	41312
6	180	716	9.99	41820
6	190	716	11.45	42012
6	200	716	12.79	41792
7	20	3533	15.38	44872
7	30	2954	22.69	46636
7	40	2754	31.59	46976
7	50	2633	47.65	46620
7	60	2590	66.47	46896
7	70	2564	88.52	48484
7	80	2551	122.77	47412
7	90	2507	153.33	48088
7	100	2510	182.73	49052
7	110	2502	197.33	49336
7	120	2511	221.21	49852
7	130	2474	246.88	51332
7	140	2466	277.74	51204
7	150	2463	308.22	51548
7	160	2450	327.59	52180
7	170	2457	351.13	53480
7	180	2459	370	56092
7	190	2451	390.21	56852
7	200	2446	416.08	56816
8	20	13158	291.41	63532
8	30	10901	798.78	63396
8	40	10019	1339.07	65760
8	50	9631	1541.46	68508
8	60	9261	1895.9	67664
8	70	9163	2387.82	71300
8	80	8983	2972.28	75476
8	90	8924	3106.15	75876
8	100	8959	3453.8	78280
8	110	8807	3928.08	80948
8	120	8794	4357.61	82324
8	130	8761	4574.22	86948
8	140	8739	5064.88	89704
8	150	8744	5412.17	91064
8	160	8693	5852.06	93500
8	170	8669	6180.6	97392
8	180	8680	6471.36	98600
8	190	8680	7012.31	101840
8	200	8695	7513.07	104916
9	20	51005	4987.4	133324
9	30	41285	14121.3	128908
9	40	36871	19260.2	132144
9	50	34715	25349.8	139856
9	60	33797	31074.4	147852
9	70	33210	39441.5	159380
9	80	32688	45482.6	168440
9	90	32425	51917.6	178260
9	100	31993	57463.7	188584
9	110	32219	65538.1	197568
9	120	32027	70489.7	207604
9	130	31961	77534.6	217340
9	140	31601	82798.4	226728
9	150	31807	90375.9	238824
9	160	31615	95562	247732
9	170	31495	102287	259448
9	180	31451	108180	268512
9	190	31433	113932	277460
9	200	30687	117249	286460
10	20	206489	37011.9	432616
10	30	152915	165137	390348
10	40	132998	258256	398932
10	50	126699	424115	430992
10	60	122353	542671	464924
10	70	119739	125912	361192
10	80	117377	329270	435676
10	90	115018	535.866	491080
10	100	114444	705218	911292
10	110	113526	835045	969484
10	120	112986	923175	1007388
10	130	112747	1046735	1032708
10	140	112043	1.13637e+06	1018324
10	150	112302	1.33701e+06	1037812
10	160	112113	1.45004e+06	1017888
10	170	111657	1.66938e+06	1034756
10	180	111127	1.72853e+06	1027304
10	190	111192	2.07883e+06	1034788
10	200	111148	2.36437e+06	1026528
